# Supplementary material
Source: PubMed Central journal article supplement (PMC4727156)
Supplement: supp_115.229393_229393Supplemental_fig_1.pdf [file supp_115.229393_229393Supplemental_fig_1.pdf]

## Factors Influencing the CNS Distribution of a Novel PI3K/mTOR Inhibitor GSK2126458: Implications for Overcoming Resistance with Combination Therapy for Melanoma Brain Metastases

Authors: Shruthi Vaidhyathan\*, Brynna Wilken-Resman\*, Daniel J Ma, Karen E Parrish, Rajendar K Mittapalli , Brett L Carlson, Jann N Sarkaria, William F Elmquist

Journal of Pharmacology and Experimental Therapeutics

### Supplemental Figure 1

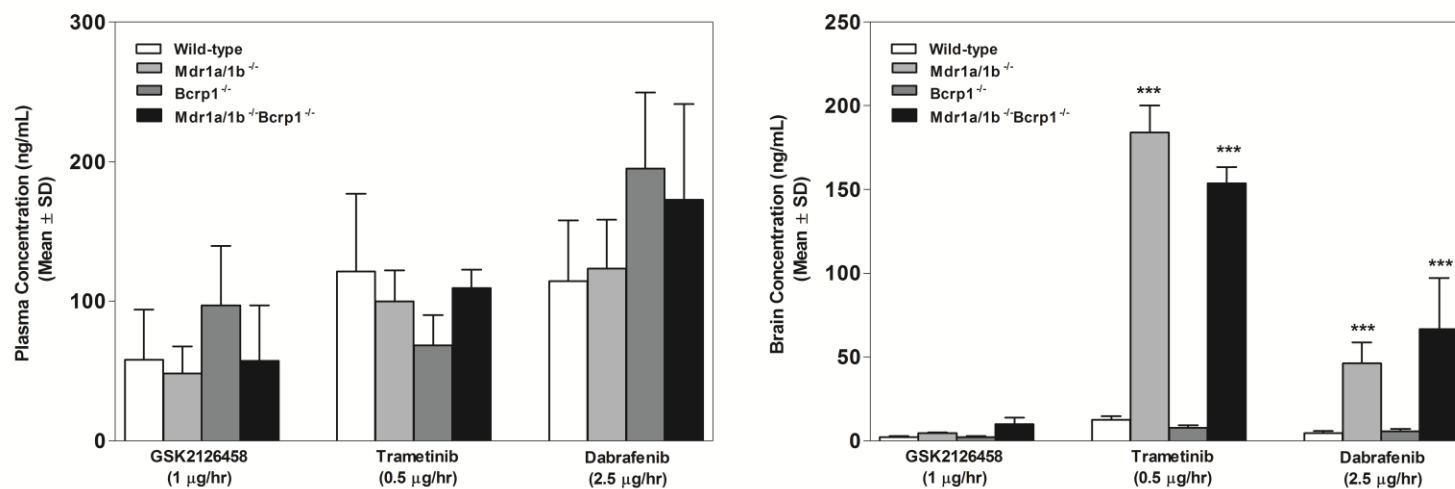

**Figure Legend**

**Plasma and brain concentrations after a 48 hour simultaneous intraperitoneal infusion of GSK2126458 (1 µg/hr) dabrafenib (2.5 µg/hr) and trametinib (0.5 µg/hr), n=3-4, plasma concentrations are not significantly different as compared to corresponding wild-type, \*\*\*p< 0.05 compared to corresponding brain concentration in wild-type.**
